# Supplementary material for: Efficacy of closed cell self expandable metallic stent for peripheral arterial disease in the porcine iliac artery
Source: PubMed Central journal article supplement (PMC10219949; doi:10.1038/s41598-023-35878-y), 2023-05-26
Supplement: 41598_2023_35878_MOESM1_ESM.pdf [file 41598_2023_35878_MOESM1_ESM.pdf]

# Supplementary Information

## **Efficacy of Closed cell Self expandable Metallic Stent for Peripheral Arterial Disease in the Porcine Iliac Artery**

**Authors:** Dae Sung Ryu<sup>1†</sup>, Dong-Sung Won<sup>1†</sup>, Ji Won Kim<sup>1</sup>, Yubeen Park<sup>1</sup>, Song Hee Kim<sup>1</sup>, Jeon Min Kang<sup>1</sup>, Chu Hui Zeng<sup>1</sup>, Dohyung Lim<sup>2</sup>, Hyun Choi<sup>2\*</sup>, Jung-Hoon Park<sup>1\*</sup>

### **Affiliations:**

<sup>1</sup>Biomedical Engineering Research Center, Asan Institute for Life Sciences, Asan Medical Center, 88 Olympic-ro 43-gil, Songpa-gu, Seoul, 05505, Republic of Korea

<sup>2</sup>Department of Mechanical Engineering, Sejong University, 209, Neungdong-ro, Gwangjin-gu, Seoul, 05006, Republic of Korea

<sup>†</sup>D.S.R., and D.-S.W. contributed equally to this work and are co-first authors.

<sup>\*</sup>H.C., and J.-H.P. contributed equally to this work and are co-corresponding authors.

**Correspondence:** Jung-Hoon Park, Ph.D.<sup>1</sup>, Hyun Choi<sup>2</sup>

<sup>1</sup>Biomedical Engineering Research Center, Asan Institute for Life Sciences, Asan Medical Center, 88 Olympic-ro 43-gil, Songpa-gu, Seoul, 05505, Republic of Korea

Tel: +82-2-3010-4123

Fax: +82-2-476-0090

E-mail: [jhparkz@amc.seoul.kr](mailto:jhparkz@amc.seoul.kr)

<sup>2</sup>Department of Mechanical Engineering, Sejong University, 209, Neungdong-ro, Gwangjin-gu, Seoul, 05006, Republic of Korea

Tel: +82-2-3408-3672

Fax: +82-2-3408-4333

E-mail: [godsknight96@hanmail.net](mailto:godsknight96@hanmail.net)

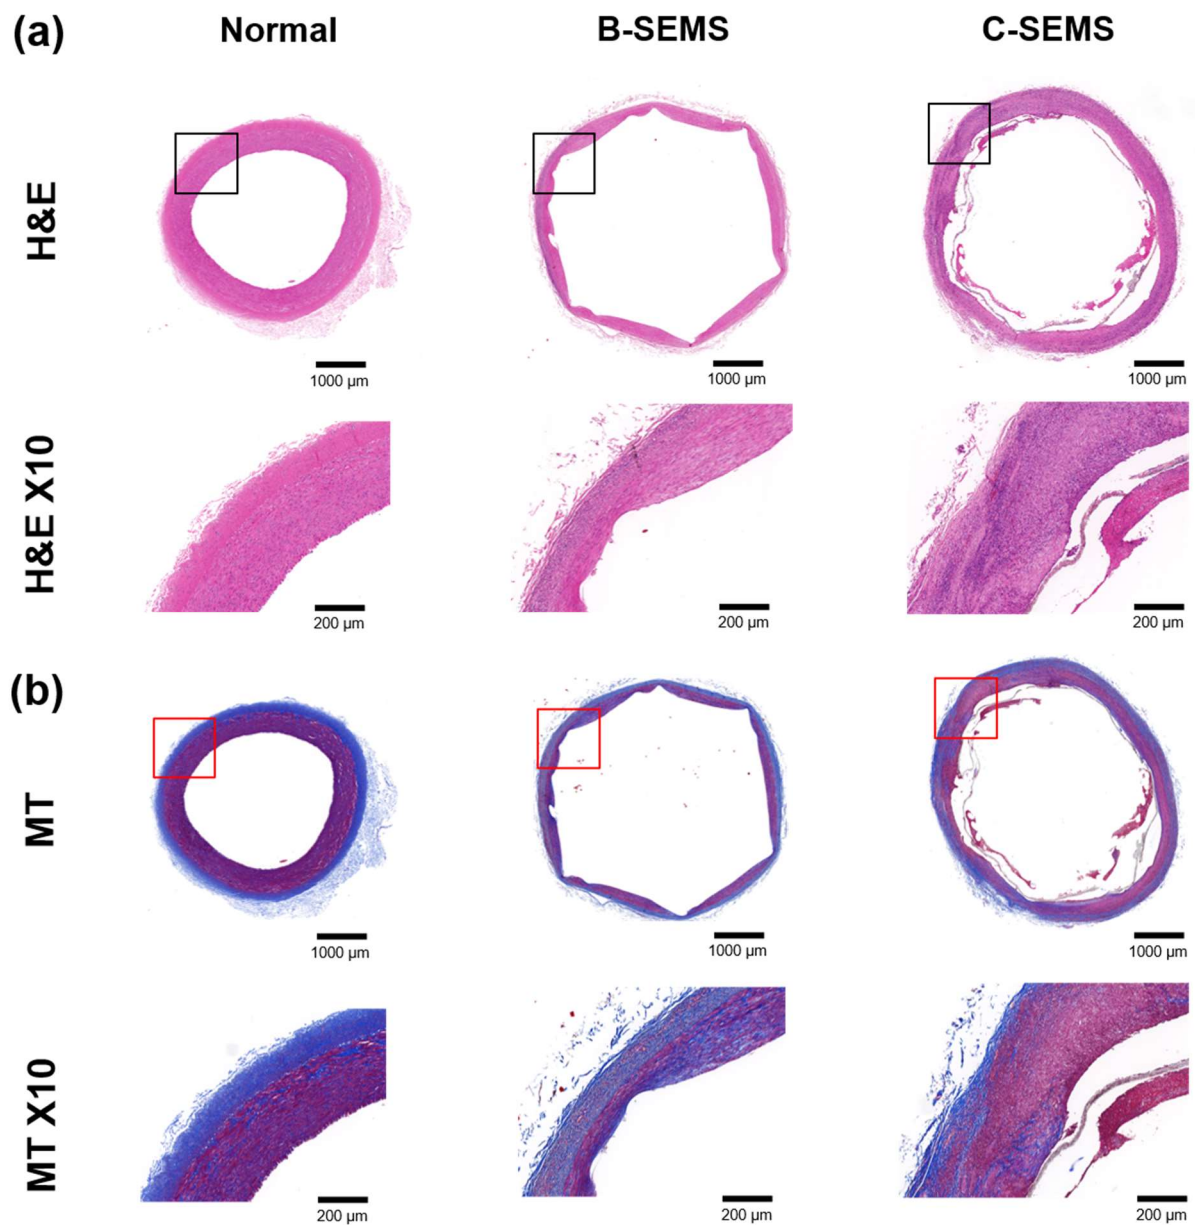

**Supplementary Figure 1.** Representative images showing serial histological changes in normal iliac artery, B-SEMS, and C-SEMS. (a) H&E staining with X 2 and X 10 magnifications. X 10 images indicate locations for the higher magnification (*black boxes*). (b) MT staining with X 2 and X 10 magnifications. X 10 images indicate locations for the higher magnification (*red boxes*). Note. B-SEMS: bare closed-cell self-expandable metallic stent, C-SEMS: covered closed-cell self-expandable metallic stent, H&E: hematoxylin and eosin, MT: Masson trichrome
